# Supplementary material for: On the semantic representation of risk
Source: PubMed Central journal article supplement (PMC9269897; doi:10.1126/sciadv.abm1883), 2022-07-08
Supplement: sciadv.abm1883_sm.pdf [file sciadv.abm1883_sm.pdf]

Supplementary Materials for  
**On the semantic representation of risk**

Dirk U. Wulff *et al.*

Corresponding author: Dirk U. Wulff, [dirk.wulff@gmail.com](mailto:dirk.wulff@gmail.com)

*Sci. Adv.* **8**, eabm1883 (2022)  
DOI: 10.1126/sciadv.abm1883

**This PDF file includes:**

Sections S1 to S5  
Tables S1 and S2  
Figs. S1 to S4  
References

## **S1: Word translation**

The translation of German Level 1 responses to English was carried out in a two-stage procedure. First, words were translated automatically (as a newline-separated list) using the free DeepL translation service. Then, in a second step, the accuracy of translations was confirmed manually. This was necessary especially to appropriately interpret polysemious words such as "einsatz", which, among others, can mean "mission" (suggested by DeepL) or "stake" (used after manual correction). See Table S1 and Table S1 for the full list of translations.

**Table S1**

*German to English translation*

| German             | English         | German             | English        | German             | English            | German            | English           |
|--------------------|-----------------|--------------------|----------------|--------------------|--------------------|-------------------|-------------------|
| risiko             | risk            | adrenalin          | adrenaline     | skifahren          | skiing             | geschäft          | business          |
| angst              | fear            | wette              | bet            | freudig            | joyful             | dunkelheit        | darkness          |
| arbeit             | work            | börse              | stock exchange | möglichkeit        | opportunity        | zweifel           | doubt             |
| freude             | joy             | spekulation        | speculation    | abwägen            | ponder             | ansteckung        | infection         |
| mut                | courage         | arbeitsplatz       | workplace      | kalkulierbar       | calculable         | stress            | stress            |
| gefahr             | danger          | leichtsinn         | recklessness   | kosten             | cost               | überlegung        | consideration     |
| rauchen            | smoking         | unsicher           | unsafe         | bergsteigen        | mountaineering     | geldverlust       | money loss        |
| tod                | death           | wasser             | water          | minimieren         | minimize           | liebe             | love              |
| gesundheit         | health          | wetter             | weather        | gesellschaftsspiel | party game         | umwelt            | environment       |
| unfall             | accident        | herbst             | autumn         | wim thaelke        | wim thaelke        | spontaneität      | spontaneity       |
| ungewiss           | uncertain       | sicherheit         | safety         | absicherung        | hedging            | versicherungen    | insurance         |
| spiel              | game            | straßenverkehr     | road traffic   | haus               | house              | flucht            | escape            |
| altersarmut        | age poverty     | lotto              | lotto          | absturz            | crash              | niedrig           | low               |
| schaden            | damage          | fallschirmsprung   | skydiving      | banken             | banks              | freundschaft      | friendship        |
| verlust            | loss            | analyse            | analysis       | schwer             | heavy              | klima             | climate           |
| schlecht           | bad             | rente              | pension        | beruf              | profession         | kind              | child             |
| versicherung       | insurance       | wagemut            | audacity       | verantwortung      | responsibility     | scheitern         | failure           |
| vorsicht           | caution         | chance             | chance         | risikobereitschaft | risk appetite      | aufpassen         | pay attention     |
| zwo, eins, risiko. | two, one, risk. | zufall             | coincidence    | faktor             | factor             | unbekanntes       | unknown           |
| wagnis             | dare            | fußball            | soccer         | schnee             | snow               | ängstlich         | fearful           |
| verkehr            | traffic         | ehe                | marriage       | schmerzen          | pain               | veränderung       | change            |
| gefahren           | dangers         | riskant            | risky          | negativ            | negative           | nutzen            | benefit           |
| darkwin duck       | darkwin duck    | autofahren         | driving        | bedenken           | concern            | beziehung         | relationship      |
| brettspiel         | board game      | fliegen            | flying         | unbekannt          | unknown            | möglichkeiten     | opportunities     |
| bewertung          | rating          | schutz             | protection     | abschätzen         | estimate           | lust              | desire            |
| leben              | life            | motorradfahren     | motorcycling   | aktie              | share              | notwendig         | necessary         |
| eingehen           | take a chance   | spontan            | spontaneous    | job                | job                | ablehnen          | reject            |
| fun                | aufregung       | aufregung          | excitement     | projekt            | project            | abschätzung       | estimate          |
| einschätzung       | assessment      | klettern           | climbing       | alkohol            | alcohol            | investition       | investment        |
| geld               | money           | mutig              | courageous     | unvermeidbar       | unavoidable        | autobahn          | highway           |
| gefährlich         | dangerous       | glatteis           | black ice      | unkalkulierbar     | incalculable       | geschwindigkeit   | speed             |
| extremsport        | extreme sports  | ungewissheit       | uncertainty    | zeit               | time               | unwissenheit      | ignorance         |
| sport              | sport           | glück              | luck           | prüfen             | check              | risikominimierung | risk minimization |
| fahren             | driving         | hilfe              | help           | weihnachten        | christmas          | reich             | rich              |
| einschätzen        | estimate        | politik            | politics       | wagen              | trolley            | vielleicht        | perhaps           |
| unsicherheit       | uncertainty     | operation          | operation      | vermeidbar         | avoidable          | wirtschaft        | economy           |
| auto               | car             | krieg              | war            | unberechenbar      | unpredictable      | no risk no fun    | no risk no fun    |
| bereitschaft       | readiness       | bank               | bank           | etwas wagen        | dare something     | hoffnung          | hope              |
| poker              | poker           | herausforderung    | challenge      | spannend           | exciting           | wertpapiere       | securities        |
| glücksspiel        | gambling        | terror             | terror         | verletzung         | injury             | verbrechen        | crime             |
| krankenhaus        | hospital        | gefährdung         | threat         | autorennen         | car race           | freizeit          | free time         |
| neugier            | curiosity       | urlaub             | vacation       | nervenzitzel       | thrill             | finanziell        | financial         |
| management         | management      | achtung            | attention      | warnung            | warning            | das leben         | life              |
| lebensversicherung | life insurance  | geldanlagen        | investments    | reisen             | travel             | teuer             | expensive         |
| armut              | poverty         | sonne              | sun            | not                | emergency          | jugend            | youth             |
| gewagt             | daring          | sturz              | fall           | terrorismus        | terrorism          | spielen           | play              |
| schule             | school          | schwangerschaft    | pregnancy      | chancen            | opportunities      | strasse           | street            |
| aktien             | shares          | vermeiden          | avoid          | kinder             | children           | vertrauen         | trust             |
| segeln             | sailing         | fonds              | funds          | erfahrung          | experience         | überschätzung     | overestimation    |
| risikoanalyse      | risk analysis   | vermeidung         | avoidance      | wahrscheinlichkeit | probability        | höhe              | altitude          |
| unbehagen          | discomfort      | problem            | problem        | versuch            | attempt            | neugierde         | curiosity         |
| spaß               | fun             | schmerz            | pain           | reiz               | stimulus           | straße            | road              |
| gewinn             | profit          | schnelligkeit      | speed          | fehler             | error              | partnerschaft     | partnership       |
| krankheit          | disease         | bedrohung          | threat         | abenteuerurlaub    | adventure vacation | nachteil          | disadvantage      |
| hoch               | high            | fallschirmspringen | skydiving      | probleme           | problems           | schwierig         | difficult         |
| das spiel          | the game        | alter              | age            | gewinnen           | win                | entscheidungen    | decisions         |
| groß               | great           | rendite            | return         | verlieren          | lose               | überwindung       | overcoming        |
| spannung           | tension         | zocken             | gamble         | schicksal          | fate               | blumen            | flowers           |
| bungee-jumping     | bungee jumping  | flugzeug           | airplane       | entscheidung       | decision           | lügen             | lying             |
| trump              | trump           | einsatz            | stake          | rot                | red                | unternehmen       | company           |

**Table S2***German to English translation (continued)*

| German           | English       | German          | English          | German    | English        | German          | English     |
|------------------|---------------|-----------------|------------------|-----------|----------------|-----------------|-------------|
| krebs            | cancer        | berufswechsel   | change of job    | überlegen | reflect        | waghalsig       | daring      |
| gruppe           | group         | jobwechsel      | job change       | pech      | bad luck       | existenz        | existence   |
| geldanlage       | investment    | islam           | islam            | zukunft   | future         | unwohlsein      | discomfort  |
| abwägung         | consideration | weihnachtsmarkt | christmas market | unnötig   | unnecessary    | anspannung      | tension     |
| frieden          | peace         | neugierig       | curious          | verluste  | losses         | fahrrad         | bicycle     |
| finanzen         | finances      | freeclimbing    | freeclimbing     | übermut   | overconfidence | roulette        | roulette    |
| bereit           | ready         | gut             | good             | kasino    | casino         | einbruch        | burglary    |
| abenteuer        | adventure     | schnell         | fast             | unwetter  | storm          | aufmerksamkeit  | attention   |
| kapital          | capital       | sex             | sex              | neues     | new            | abwarten        | wait        |
| nachdenken       | contemplate   | nein            | no               | leiter    | ladder         | betrug          | fraud       |
| motorrad         | motorcycle    | familie         | family           | aufregend | exciting       | lohnend         | rewarding   |
| kristall         | crystal       | wetten          | betting          | sorge     | worry          | hobby           | hobby       |
| arbeitslosigkeit | unemployment  | erfolg          | success          | bunt      | colorful       | ängste          | fears       |
| feuer            | fire          | riskieren       | risk             | sucht     | addiction      | ungeduld        | impatience  |
| herzinfarkt      | heart attack  | casino          | casino           | ärger     | trouble        | fünfzig fünfzig | fifty fifty |

## S2: Network stability analysis

To assess the distinctiveness of our network components, we utilized a cluster stability approach based on bootstrap sampling. Specifically, for each individual Level 1 word in the network, we repeatedly took 1,000 samples with replacement from the word's Level 2 responses. For each set of samples, we then created a network and extracted components using the process depicted in Figure S1. For a component that is both distinct and stable, we expect that words belonging to the component would be more likely to share components with other words from the original component than with words from another component across the bootstrap samples.

Figure S1 shows each word's (each row) probability of sharing a component with words from its own and the other four components in a way that accounts for cluster sizes. We found that 208 of 307 words, which are shown in the original component color, were more likely to share a component with words of the same original component (than with words from other components). This measure of consistency was high for the component *Threat* (50 out of 57 words), *Investment* (50/64), and *Fortune* (72/82). By comparison, the components *Activity* (30/64) and, especially, *Analysis* (6/40) showed lower consistency. Among the words in these two clusters that did not preferably share a cluster with its own words, many preferably shared clusters with words of *Threat*. This was the case for 17 out of 34 words in *Activity* and 28 out of 35 words in *Analysis*. This suggests a certain level of semantic overlap, especially for *Threat* and *Activity*.

Overall, it should be noted that all words were found to frequently share clusters with words from other clusters. This highlights the possibility of alternative clusterings of our data that we address in the following section. That said, it seems probable that the words belonging to components *Threat*, *Investment*, and *Fortune* would likely also share memberships in alternative clusterings. Moreover, the most representative words for the components, e.g., "danger" for *Threat* or "happiness" for *Fortune*, showed particularly high levels of stability, suggesting that the corresponding components possess a robust thematic core. For *Analysis* and *Activity* such cores are absent in our clustering.

Finally, unsupervised techniques such as modularity detection should not be viewed as discovering an underlying *true* structure, but rather as delivering useful and, ideally, robust summarization that facilitates an intuitive understanding of the data [37]. We believe that our clustering achieves this and can, as we describe below, be seen as a robust way of summarizing the data.

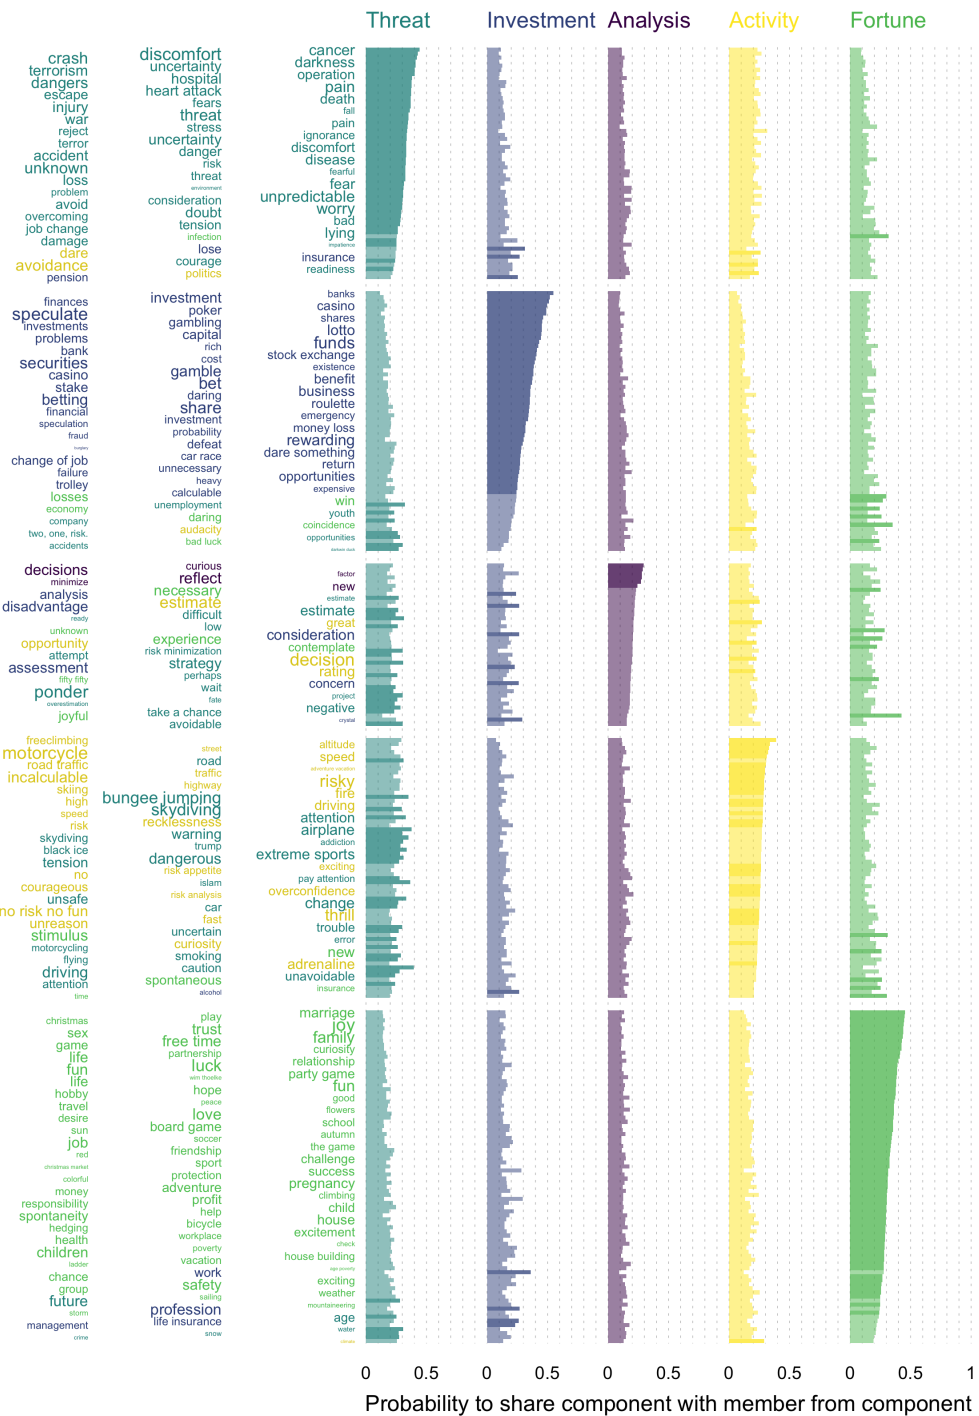

**Figure S1**

*Network stability. Each row shows the probability of a word sharing clusters with words from each of the five clusters across 1,000 bootstrap samples. Probabilities are shown as vertical bars for each of the five clusters (columns). Opaque vertical bars indicate that the probability is highest for the original cluster. Word labels are colored according to its preferred cluster, i.e., the cluster whose words most frequently share cluster membership with the word. Label size varies as a function of the word's importance in each of the clusters as determined by PageRank.*

### S3: Alternative clustering solutions

To shed light on the robustness of our results with respect to clustering algorithms and the number of clusters extracted, we used an alternative approach to assess the similarities of Level 1 responses using hierarchical clustering, which in contrast to the Louvain approach reported in the main text, leaves the choice of number of clusters to the analyst. Specifically, we used the agglomerative variant and Ward's minimum variance linkage method to derive clustering solutions for two up to ten different clusters. Figure S2 shows the agglomerative progression from ten to two clusters with each cluster shown as a word cloud.

The hierarchical clustering algorithm produced clusters at different levels that clearly match the components identified by the Louvain algorithm. The components *Threat*, *Fortune*, and *Investment* emerge consistently at the left-most, second to right-most, and right-most arms of the Figure, while the component *Analysis* is included in the central-most arm and emerges as a separate cluster at the bottom. The only component that does seem to be captured by distinct clusters is *Activity*, which is in line with the stability results presented above and suggests that the *Activity* consists of mixed clusters capturing various aspects of *Threat*. The hierarchical clustering furthermore reveals several intriguing hierarchical relationships between the clusters. First, the component *Investment* appears to consist of two sub-components capturing the distinction between investing and betting that also has been documented in previous work on risk taking [9]. Second, the component *Fortune* appears to consist of two sub-components capturing fun and games on the one hand, and safety and insurance on the other hand. Third, the component *Threat* appears to consist of several sub-components including distinct sub-components focusing on transportation-related, job-related, or political threats.

It is important to note that the hierarchical clustering approach relies on a similar yet different objective function from the Louvain algorithm employed in the main analysis, implying that the two methods cannot be expected to always produce identical results. The fact that the hierarchical clustering approach produces similar clusters (at a specific hierarchical level) to those identified by the Louvain algorithm suggests that the five clusters we consider in the main paper can be identified robustly across different clustering approaches.





#### S4: Sentiment and Risk Similarity

To further explore potential commonalities and differences between the semantic network of risk between languages, we also characterized the five components of risk in the Dutch and English networks with respect to sentiment and risk similarity following the same approach as in the main analysis for German presented in the article. Sentiment was determined using language specific valence dictionaries in Dutch [60] and English [61]. Risk similarity was determined using the Jaccard similarity between the word risk and all other words in the respective language. The results show that the patterns of component sentiment and risk similarities in the two languages closely resemble those presented for German (see Figure 4D). The components *Threat* and *Fortune* again occupy the extreme position on the sentiment spectrum with *Threat* having the most negative and *Fortune* having the most positive sentiment. Note that here sentiment is measured on a different scale with mid points of 4 (Dutch) and 5 (English) rather than 0 as in the main analysis, due to differences in response formats in the generation of the different sentiment dictionaries. Furthermore, the component *Threat* is again high in risk similarity, clearly exceeding the risk similarity of the component *Fortune*, the component *Analysis*, and, in the case of English, the component *Activity*. However, in contrast to the results obtained for German, the component *Investment* was found to have the strongest risk similarity in both Dutch and English.

All in all, these results further underpin the commonalities in the semantic representation of risk in German, Dutch, and English, while also revealing small, but notable differences in the relative placement of specific components (e.g., *Investment*) that could reflect intercultural differences between languages.

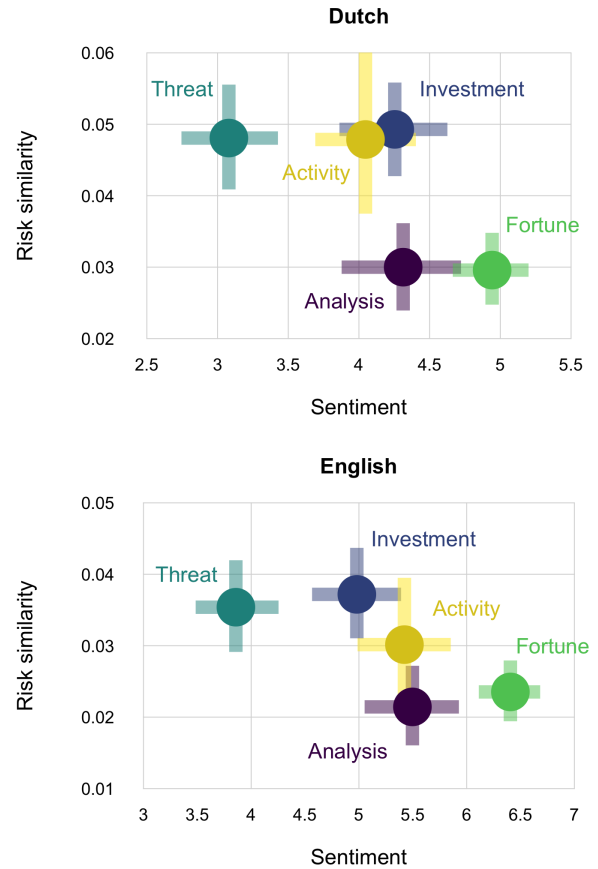

**Figure S3**

The figures shows the average sentiment and proximity to risk for each of the five components in Dutch and English. Error bars indicate bootstrapped 95% confidence intervals.

### **S5: Demographic differences in risk associations**

To further investigate demographic differences in the semantic representation of risk, we analyzed people's free associations to risk as a function of education level, employment status, and relationship status in addition to age and gender. Figure S4 shows the retrieval proportion of retrievals from each of the five risk components, as well as the retrieval proportions for each Level 1 associate of risk that was retrieved at least 10 times ( $n = 91$ ), separately for each demographic group. The analysis revealed considerable demographic differences in the relative frequency of risk components for employment status ( $sd = .025$ ) and marital status ( $sd = .020$ ), but not education level ( $sd = .011$ ), as indicated by the average standard deviation of groups across risk components and compared to those of age ( $sd = .19$ ) and gender ( $sd = .024$ ). Furthermore, group differences in employment and marital status appeared to be similar to those observed for age. Specifically, similar to older participants, married and pensioned participants tended to show higher levels of *Threat*, lower levels of *Fortune*, and higher levels of *Activity*, as compared to the respectively other groups. These similarities can at least partially be explained by high correlations between those two demographic variables and age, potentially suggesting that the age-related differences we identify may be the product of individuals' social roles rather than age per se. Note that our study design only sampled age and gender in balanced fashion, thus limiting variation in group differences for other demographic variables.

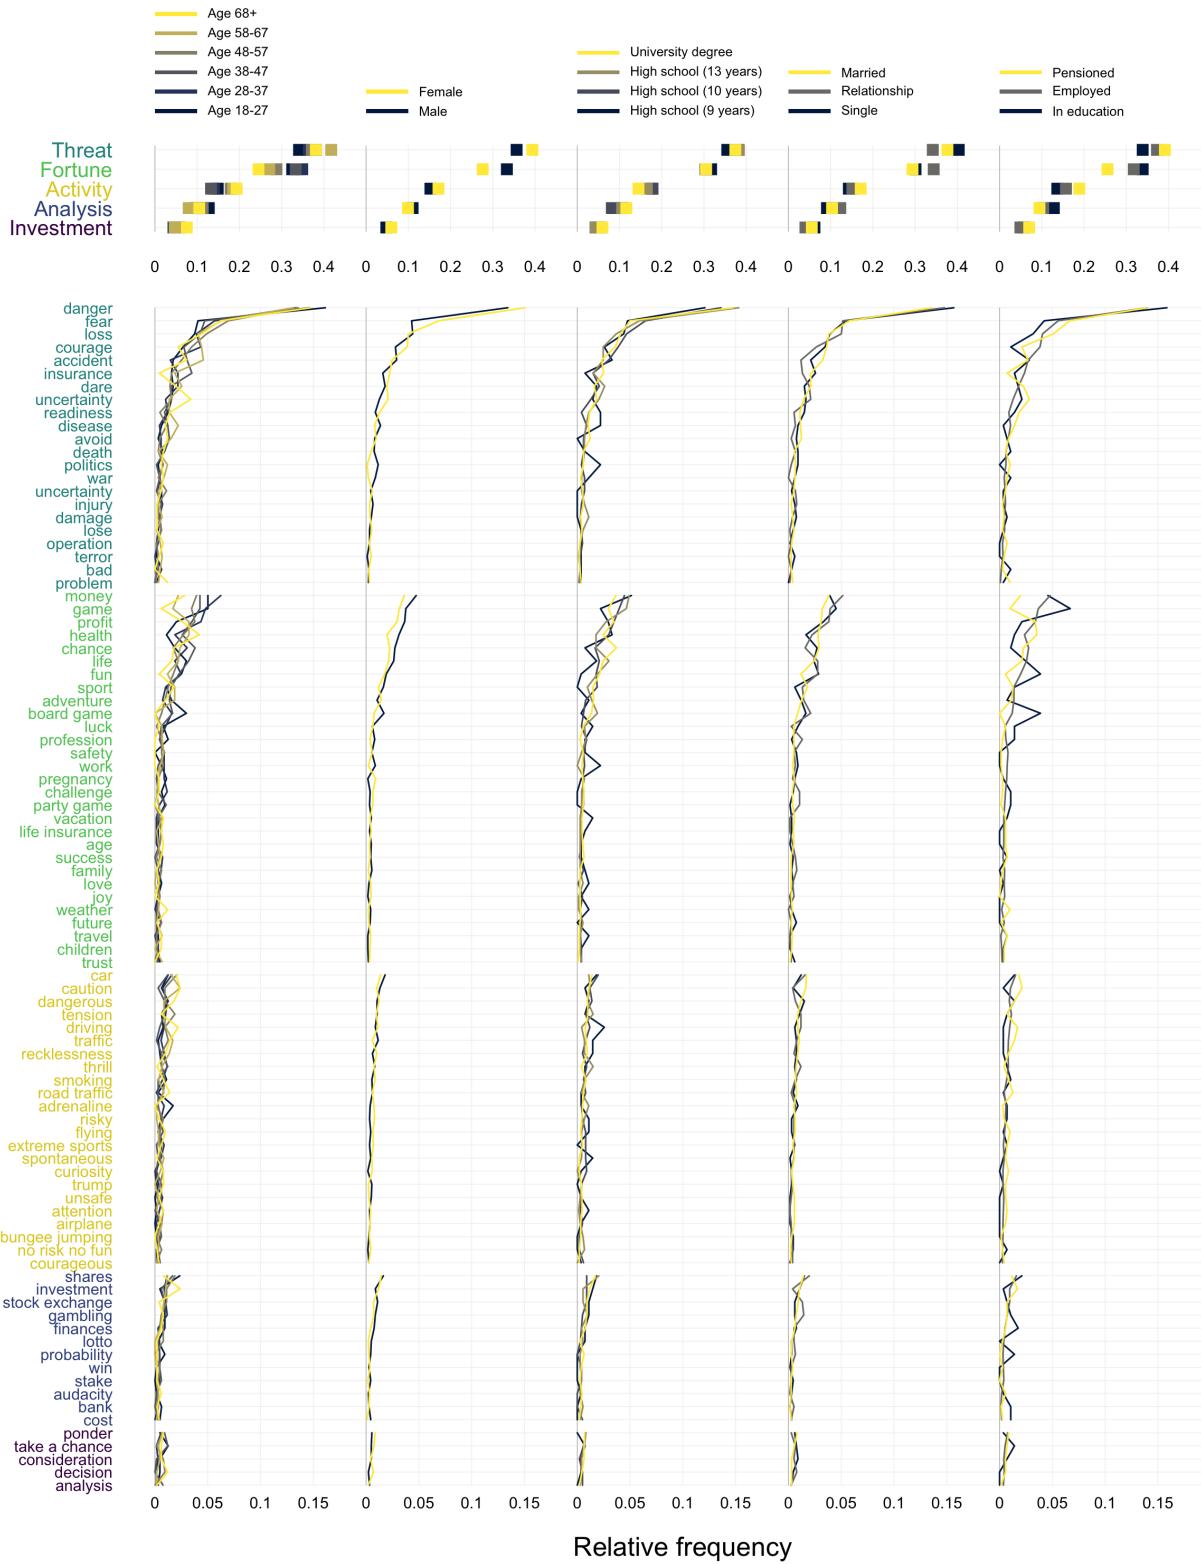

**Figure S4**

*Demographic differences in risk associations. Relative retrieval frequencies as a function of demographic age (first column), gender (second column), education (third column), marital status (fourth column), and employment status (fifth column).*

## REFERENCES AND NOTES

1. C. Starr, Social benefit versus technological risk: What is our society willing to pay for safety? *Science* **165**, 1232–1238 (1969).
2. Y. Li, T. Hills, R. Hertwig, A brief history of risk. *Cognition* **203**, 104344 (2020).
3. T. Aven, The risk concept—Historical and recent development trends. *Reliab. Eng. Syst.Saf.* **99**, 33–44 (2012).
4. M. Boholm, The semantic field of risk. *Saf. Sci.* **92**, 205–216 (2017).
5. S. Boudia, N. Jas, Introduction: Risk and ‘risk society’ in historical perspective. *Hist. Technol.* **23**, 317–331 (2007).
6. T. Schonberg, C. R. Fox, R. A. Poldrack, Mind the gap: Bridging economic and naturalistic risk-taking with cognitive neuroscience. *Trends Cogn. Sci.* **15**, 11–19 (2011).
7. P. Slovic, Perception of risk. *Science* **236**, 280–285 (1987).
8. T. Dohmen, A. Falk, D. Huffman, U. Sunde, J. Schupp, G. G. Wagner, Individual risk attitudes: Measurement, determinants, and behavioral consequences. *J. Eur. Econ. Assoc.* **9**, 522–550 (2011).
9. E. U. Weber, A.-R. Blais, N. E. Betz, A domain-specific risk-attitude scale: Measuring risk perceptions and risk behaviors. *J. Behav. Decis. Mak.* **15**, 263–290 (2002).
10. R. D. Ravert, L. M. Murphy, M. B. Donnellan, Valuing risk: Endorsed risk activities and motives across adulthood. *J. Adult Dev.* **26**, 11–21 (2019).
11. B. Fischhoff, P. Slovic, S. Lichtenstein, S. Read, B. Combs, How safe is safe enough? A psychometric study of attitudes towards technological risks and benefits. *Policy Sci.* **9**, 127–152 (1978).

12. N. Duell, L. Steinberg, Positive risk taking in adolescence. *Child Dev. Perspect.* **13**, 48–52 (2019).
13. E. M. Bonem, P. C. Ellsworth, R. Gonzalez, Age differences in risk: Perceptions, intentions and domains. *J. Behav. Decis. Mak.*, **28**, 317–330 (2015).
14. C. Marris, I. Langford, T. Saunderson, T. O’Riordan, Exploring the “psychometric paradigm”: Comparisons between aggregate and individual analyses. *Risk Anal.*, **17**, 303–312 (1997).
15. M. Siegrist, C. Keller, H. A. Kiers, A new look at the psychometric paradigm of perception of hazards. *Risk Anal.* **25**, 211–222 (2005).
16. R. C. Arslan, M. Brümmer, T. Dohmen, J. Drewelies, R. Hertwig, G. G. Wagner, How people know their risk preference. *Sci. Rep.* **10**, 15365 (2020).
17. R. Frey, D. Richter, J. Schupp, R. Hertwig, R. Mata, Identifying robust correlates of risk preference: A systematic approach using specification curve analysis. *J. Pers. Soc. Psychol.* **120**, 538–557 (2021).
18. J. J. Rolison, Y. Hanoch, S. Wood, P.-J. Liu, Risk-taking differences across the adult life span: A question of age and domain. *J. Gerontol.B Psychol. Sci. Soc. Sci.*, **69**, 870–880 (2014).
19. S. De Deyne, D. J. Navarro, A. Perfors, G. Storms, Structure at every scale: A semantic network account of the similarities between unrelated concepts. *J. Exp. Psychol. Gen.* **145**, 1228–1254 (2016).
20. S. Mollin, Combining corpus linguistic and psychological data on word co-occurrences: Corpus collocates versus word associations. *Corpus Linguist. Linguist. Theory* **5**, 175–200 (2009).

21. H. Vankrunkelsven, S. Verheyen, G. Storms, S. De Deyne, Predicting lexical norms: A comparison between a word association model and text-based word co-occurrence models. *J. Cogn.* **1**, 45 (2018).
22. S. De Deyne, A. Perfors, D. J. Navarro, Predicting human similarity judgments with distributional models: The value of word associations, in *Proceedings of the COLING 2016, the 26th International Conference on Computational Linguistics: Technical papers*, (COLING, 2016), pp. 1861–1870.
23. T. Mikolov, E. Grave, P. Bojanowski, C. Puhersch, A. Joulin, Advances in pre-training distributed word representations. arXiv:1712.09405 [cs.CL] (26 December 2017).
24. S. De Deyne, D. J. Navarro, A. Perfors, M. Brysbaert, G. Storms, The “small world of words” English word association norms for over 12,000 cue words. *Behav. Res. Methods* **51**, 987–1006 (2019).
25. C. S. Q. Siew, D. U. Wulff, N. M. Beckage, Y. N. Kenett, Cognitive network science: A review of research on cognition through the lens of network representations, processes, and dynamics. *Complexity* **2019**, 2108423 (2019).
26. Y. N. Kenett, N. M. Beckage, C. S. Q. Siew, D. U. Wulff, Cognitive network science: A new frontier. *Complexity* **2020**, 6870278 (2020).
27. S. Ioffe, Improved consistent sampling, weighted Minhash and L1 sketching, in *Proceedings of the 2010 IEEE International Conference on Data Mining* (IEEE, 2010), pp. 246–255.
28. A. Strehl, J. Ghosh, R. Mooney, Impact of similarity measures on web-page clustering, in *Workshop on Artificial Intelligence for Web Search* (AAAI Technical Report WS-00-01, AAAI, 2000), pp. 58–64.
29. A. Huang, Similarity measures for text document clustering, in *Proceedings of the Sixth New Zealand Computer Science Research Student Conference (NZCSRSC2008)*, (NZCSRS, 2008), pp. 9–56.

30. S. M. Saad, S. S. Kamarudin, Comparative analysis of similarity measures for sentence level semantic measurement of text, in *Proceedings of the 2013 IEEE International Conference on Control System, Computing and Engineering* (IEEE, 2013), pp. 90–94.
31. V. D. Blondel, J.-L. Guillaume, R. Lambiotte, E. Lefebvre, Fast unfolding of communities in large networks. *J. Stat. Mech.* **2008**, P10008 (2008).
32. P. Miasnikof, A. Y. Shestopaloff, A. J. Bonner, Y. Lawryshyn, P. M. Pardalos, A density based statistical analysis of graph clustering algorithm performance. *J. Complex Netw.* **8**, cnaa012 (2020).
33. N. Williams, G. Arnulfo, S. H. Wang, L. Nobili, S. Palva, J. M. Palva, Comparison of methods to identify modules in noisy or incomplete brain networks. *Brain Connect.*, **9**, 128–143 (2019).
34. C. Pradana, S. Kusumawardani, A. Permanasari, Comparison clustering performance based on Moodle log mining. *IOP Conf. Ser. Mater. Sci. Eng.*, **722**, 012012 (2020).
35. S. Emmons, S. Kobourov, M. Gallant, K. Börner, Analysis of network clustering algorithms and cluster quality metrics at scale. *PLOS ONE* **11**, e0159161 (2016).
36. C. Hennig, What are the true clusters? *Pattern Recognit. Lett.* **64**, 53–62 (2015).
37. J. M. Haslbeck, D. U. Wulff, Estimating the number of clusters via a corrected clustering instability. *Comput. Stat.* **35**, 1879–1894 (2020).
38. R. Remus, U. Quasthoff, G. Heyer, Sentiws-a publicly available German-language resource for sentiment analysis, in *Proceedings of the Seventh International Conference on Language Resources and Evaluation (LREC'10)*, (European Language Resources Association, 2010).
39. S. De Deyne, G. Storms, Word associations: Norms for 1,424 Dutch words in a continuous task. *Behav. Res. Methods*, **40**, 198–205 (2008).

40. E. Grave, P. Bojanowski, P. Gupta, A. Joulin, T. Mikolov, Learning word vectors for 157 languages. arXiv:1802.06893 [cs.CL] (19 February 2018).
41. T. J. Pleskac, R. Hertwig, Ecologically rational choice and the structure of the environment. *J. Exp. Psychol. Gen.* **143**, 2000–2019 (2014).
42. A. S. Morais, H. Olsson, L. J. Schooler, Mapping the structure of semantic memory. *Cogn. Sci.* **37**, 125–145 (2013).
43. D. U. Wulff, S. De Deyne, S. Aeschbach, R. Mata, Using network science to understand the aging lexicon: Linking individuals' experience, semantic networks, and cognitive performance. *Topics Cogn. Sci.* **14**, 93–110 (2022).
44. D. U. Wulff, S. Aeschbach, S. De Deyne, R. Mata, A data set to linking large-scale, individual semantic networks and cognitive performance. *PsyArXiv* (2021).
45. S. Bhatia, Predicting risk perception: New insights from data science. *Manag. Sci.* **65**, 3800–3823 (2019).
46. J. L. Tsai, T. Sims, Y. Qu, E. Thomas, D. Jiang, H. H. Fung, Valuing excitement makes people look forward to old age less and dread it more. *Psychol. Aging* **33**, 975–992 (2018).
47. M. K. Depping, A. M. Freund, Normal aging and decision making: The role of motivation. *Hum. Dev.* **54**, 349–367 (2011).
48. D. U. Wulff, T. Hills, R. Mata, Structural differences in the semantic networks of younger and older adults (2018); <https://doi.org/10.31234/osf.io/s73dp>.
49. M. Ramscar, C. C. Sun, P. Hendrix, H. Baayen, The mismeasurement of mind: Life-span changes in paired-associate-learning scores reflect the “cost” of learning, not cognitive decline. *Psychol. Sci.* **28**, 1171–1179 (2017).
50. D. U. Wulff, S. De Deyne, M. N. Jones, R. Mata, New perspectives on the aging Lexicon. *Trends Cogn. Sci.* **23**, 686–698 (2019).



51. R. Mata, R. Frey, D. Richter, J. Schupp, R. Hertwig, Risk preference: A view from psychology, *J. Econ. Perspect.* **32**, 155–172 (2018).
52. R. Frey, A. Pedroni, R. Mata, J. Rieskamp, R. Hertwig, Risk preference shares the psychometric structure of major psychological traits. *Sci. Adv.* **3**, e1701381 (2017).
53. R. Hertwig, D. U. Wulff, R. Mata, Three gaps and what they may mean for risk preference. *Philos. Trans. R. Soc. B* **374**, 20180140 (2019).
54. D. L. Nelson, C. L. McEvoy, S. Dennis, What is free association and what does it measure? *Mem. Cognit.* **28**, 887–899 (2000).
55. C. Zhao, S. Sahni, String correction using the damerau-levenshtein distance. *BMC Bioinformatics* **20**, 1–28 (2019).
56. G. G. Wagner, J. R. Frick, J. Schupp, “The German socio-economic panel study (SOEP): Scope, evolution and enhancements” (Technical Report SOEP papers on Multidisciplinary Panel Data Research, 2007).
57. A. Esuli, F. Sebastiani, SentiWordNet: A high-coverage lexical resource for opinion mining. *Evaluation* **17**, 26 (2007).
58. T. M. Fruchterman, E. M. Reingold, Graph drawing by force-directed placement. *Softw. Pract. Exp.* **21**, 1129–1164 (1991).
59. R. R. Bouckaert, E. Frank, Evaluating the replicability of significance tests for comparing learning algorithms, in *Proceedings of the Pacific-Asia Conference on Knowledge Discovery and Data Mining (PAKDD, 2004)*, pp. 3–12.
60. A. Moors, J. De Houwer, D. Hermans, S. Wanmaker, K. Van Schie, A.-L. Van Harmelen, M. De Schryver, J. De Winne, M. Brysbaert, Norms of valence, arousal, dominance, and age of acquisition for 4,300 Dutch words. *Behav. Res. Methods* **45**, 169–177 (2013).

61. A. B. Warriner, V. Kuperman, M. Brysbaert, Norms of valence, arousal, and dominance for 13,915 English lemmas. *Behav. Res. Methods* **45**, 1191–1207 (2013).
